# Supplementary material for: FoldX accurate structural protein–DNA binding prediction using PADA1 (Protein Assisted DNA Assembly 1)
Source: PubMed Central journal article supplement — Nucleic Acids Res. 2018 Mar 28;46(8):3852–63. doi: 10.1093/nar/gky228 (PMC5934639; doi:10.1093/nar/gky228), 2018-03-28
Supplement: gky228_supp.pdf [file gky228_supp.pdf]

## Supplementary Information

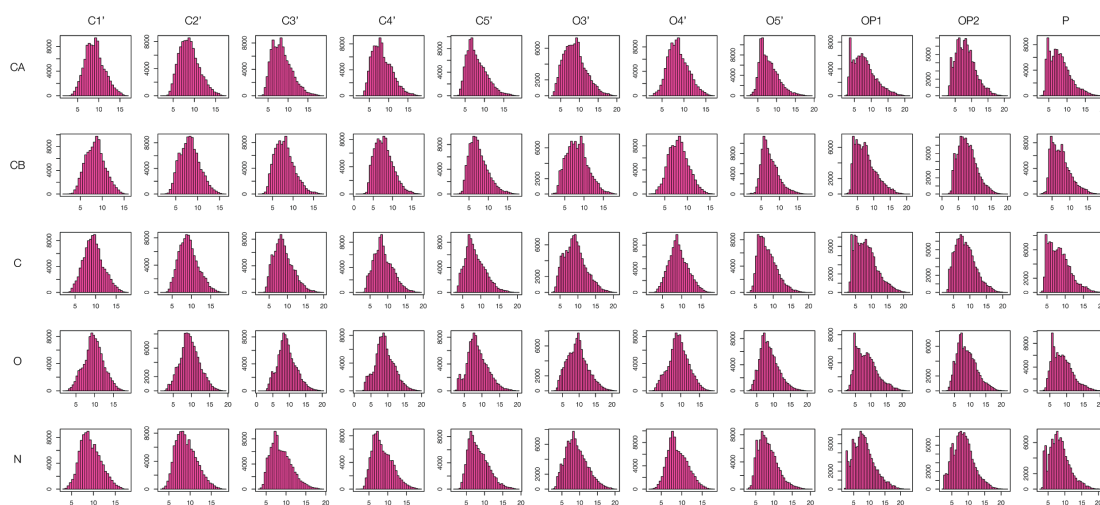

**Supplementary Figure 1:** Normal distance distributions for atomic distances between pepXs backbone atoms (C $\alpha$ , C $\beta$ , C, O, N) and dnaXs backbone atoms (C1', C2', C3', C4', C5', O3', O4', O5', OP1, OP2, P).

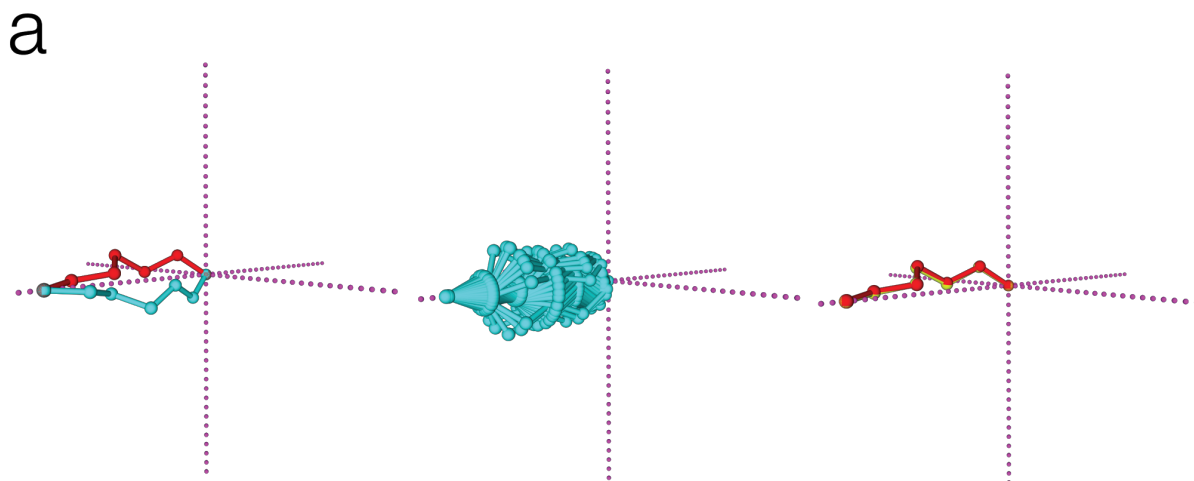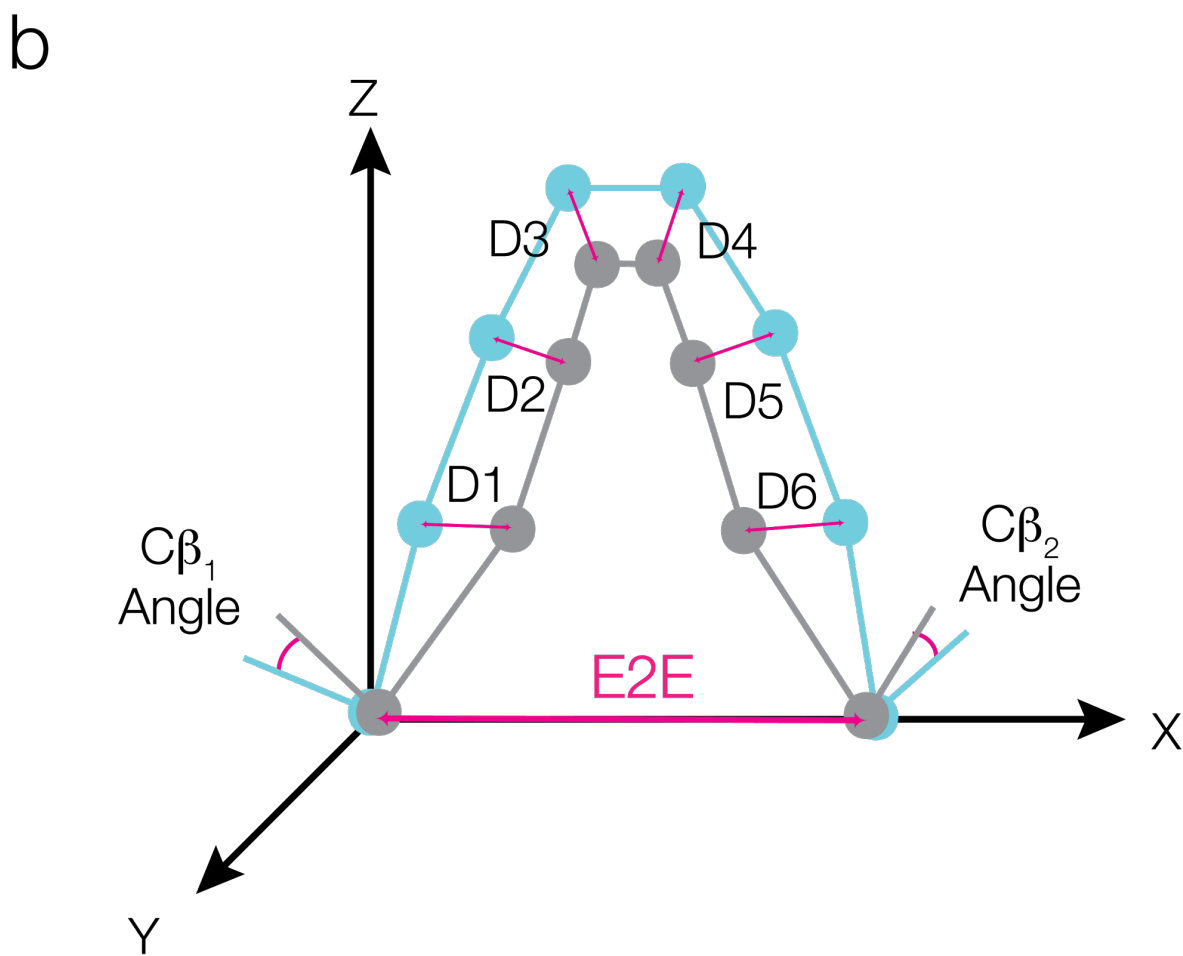

**Supplementary Figure 2:** (a) pinwheel rotation of pepX (blue) around x axis to find the best superimposition. (b)  $C\beta_1$  and  $C\beta_2$  angles are restricted by a default threshold of  $5^\circ$ . Schema for the different fit levels: fit level=2 considers D1 and D6 distances while fit level=3 considers D1,D2,D5,D6 distances, Fit level=4 considers D1,D2,D3,D4,D5,D6.

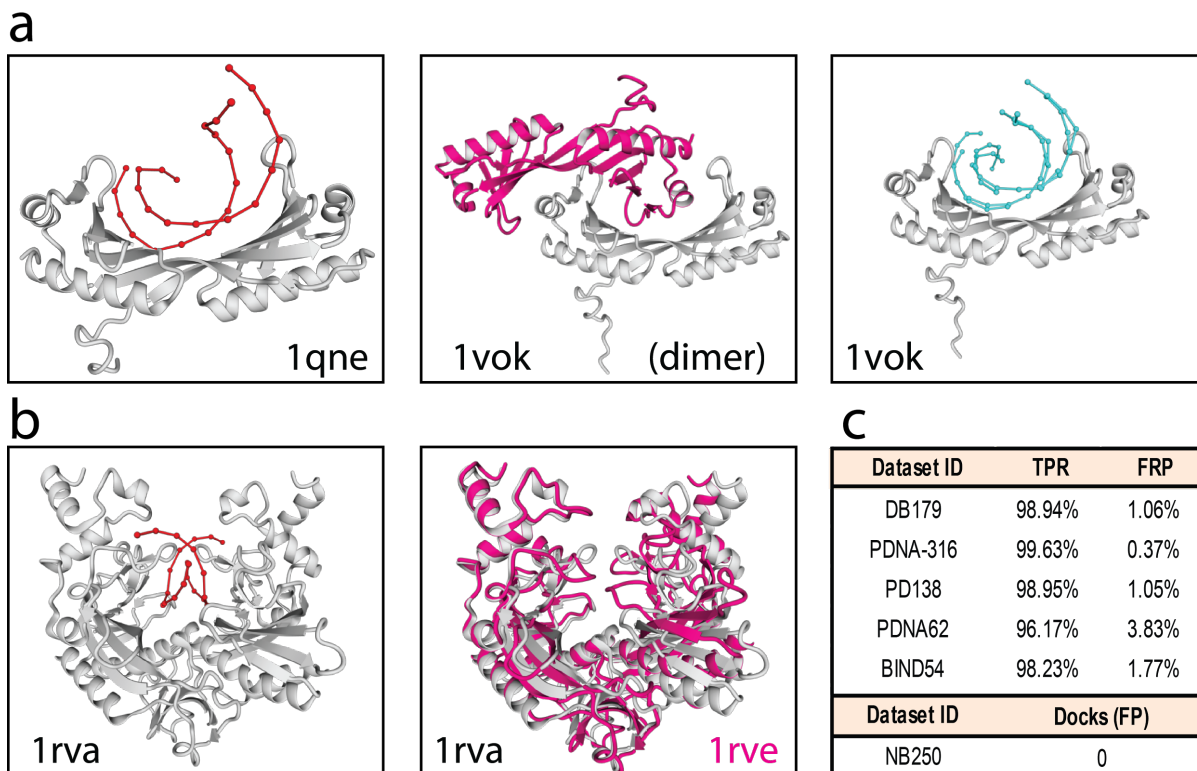

**Supplementary Figure 3:** (a) Incorrect predicted DNA binding site for 1vok unbound configuration is correctly predicted after removing one of the monomers blocking the binding site, (b) the unbounded structure 1rve presents significant differences in the DNA binding site making the docking implausible. (c) Summarized results for validation sets of binding and nonbinding proteins, a dock is considered as true positive if it has an RMSD < 1.8Å with the crystal one. The dockings were performed excluding from the analysis all those crystal representing the same UniProt ID of the target structure.

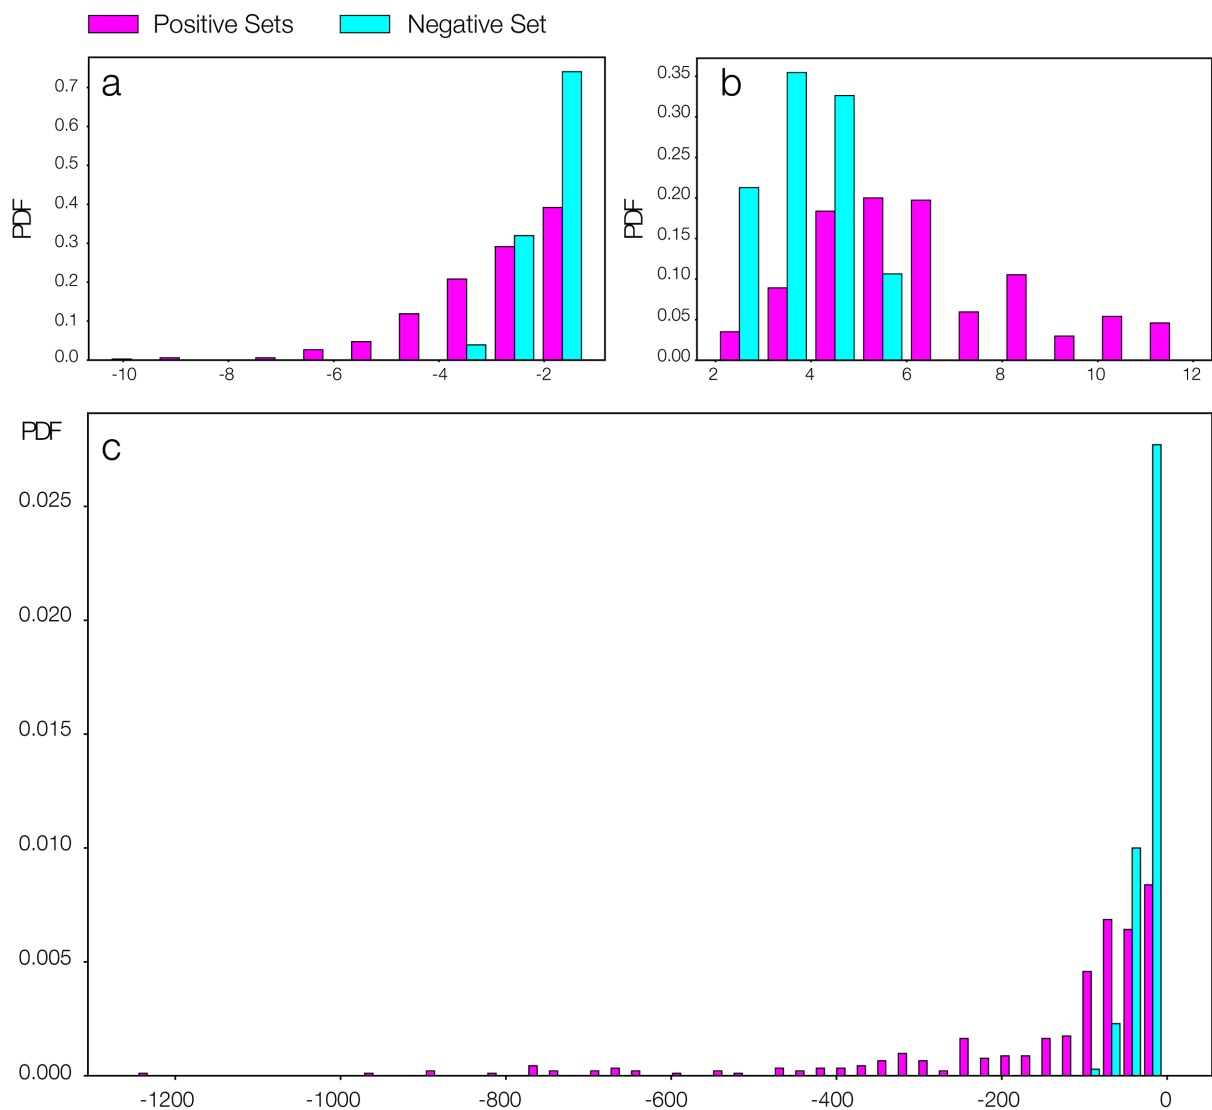

**Supplementary Figure 4:** Binding protein datasets (BIND54, DB179, PD138, PDBNA62 and PDNA-316) joined and summarized in light blue, nonbinding proteins dataset (NB250) in purple. (a) Histogram of energies ( $DG_{\text{Docking}}$ ) for accepted dockings using the exhaustive mode over the validation datasets. (b) Histogram of the accepted dockings' number of contacting nucleotides (CN) to the target proteins over the validation dataset. (c) Histogram of filtering score defined as  $DG_{\text{Docking}} * CN^2$ .

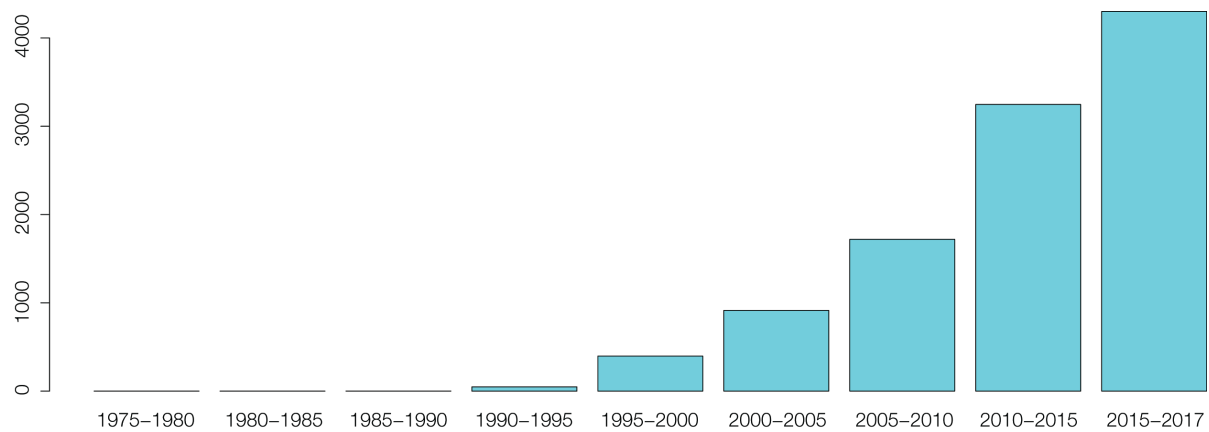

**Supplementary Figure 5:** PDB dsDP complexes deposited records.

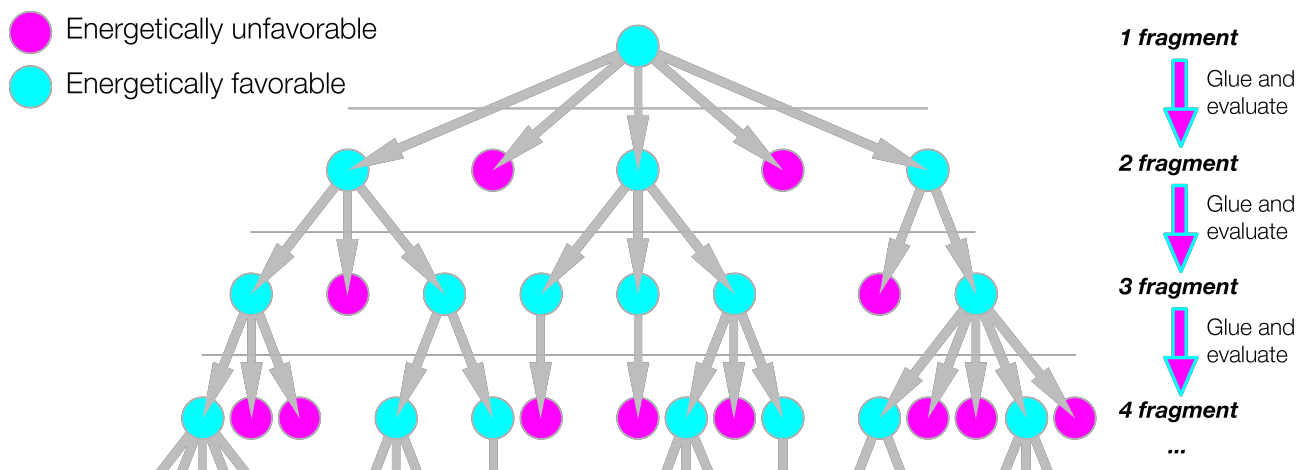

**Supplementary Figure 6:** Branch and Bound strategy of the *GlueDocks* command: each docked fragment is glued with its neighbor docks and energetically evaluated, those energetically favorables are recursively glued until reaching the maximal possible length. The solution trees are explored with a Deep-first search.

| <b>PDB</b>   | <b>UniProt</b> | <b>PFam</b> | <b>Total Docks</b> | <b>Proportion of contacting nucleotides well predicted</b> |
|--------------|----------------|-------------|--------------------|------------------------------------------------------------|
| 5hbu         | P0C093         | PF00440     | 432                | 0.93                                                       |
| 5hlh         | Q5HKZ1         | PF01047     | 23                 | 0.86                                                       |
| 5hro         | P03366         | PF06817     | 190                | 0.95                                                       |
| 5i44         | P45870         | PF13411     | 142                | 0.74                                                       |
| 5ink         | Q9JJX7         | PF03372     | 5                  | 0.43                                                       |
| 5iwm         | P66937         | PF00204     | 32                 | 0.65                                                       |
| 5j2q         | P04585         | PF00078     | 87                 | 0.92                                                       |
| 5jgh         | Q02486         | PF00505     | 225                | 0.92                                                       |
| 5jk0         | O25386         | PF00589     | 111                | 0.74                                                       |
| 5k58         | A7ZTJ2         | PF11799     | 81                 | 0.89                                                       |
| 5lgy         | P04637         | PF00870     | 985                | 0.94                                                       |
| 5t14         | Q9UBT6         | PF00817     | 21                 | 0.96                                                       |
| 5tw1         | A0QZ11         | PF13397     | 14                 | 0.84                                                       |
| <b>Total</b> |                |             | <b>2348</b>        | <b>0.88</b>                                                |

**Supplementary Table 1:** Detail of the predicted best matching sequences for a set of 13 crystals belonging to different proteins (UniProt) of different protein families (PFam). The nucleotides which are not in contact (nor its pair in the dsDNA) with the protein were not considered for the analysis. The evaluation to calculate the best sequences in this table was performed with the PADA1 all-atom statistical force field.

| DataSet                         | PDB Codes List                                                                                                                                                                                                                                                                                                                                                                                                                                                                                                                                                                                                                                                                                                                                                                                                                                                                                                                                                                                                                                                                                                                                                                                                                                                                                                                                                              |
|---------------------------------|-----------------------------------------------------------------------------------------------------------------------------------------------------------------------------------------------------------------------------------------------------------------------------------------------------------------------------------------------------------------------------------------------------------------------------------------------------------------------------------------------------------------------------------------------------------------------------------------------------------------------------------------------------------------------------------------------------------------------------------------------------------------------------------------------------------------------------------------------------------------------------------------------------------------------------------------------------------------------------------------------------------------------------------------------------------------------------------------------------------------------------------------------------------------------------------------------------------------------------------------------------------------------------------------------------------------------------------------------------------------------------|
| PADA1<br>Validation<br>Data Set | 5d23, 5ei9, 5exh, 5gke, 5gkf, 5gkg, 5gkh, 5gki, 5gkp, 5hbu, 5hdn,<br>5hf7, 5hhh, 5hhi, 5hlf, 5hlg, 5hll, 5hllk, 5hnlk, 5hod, 5hoo, 5hp1,<br>5hq2, 5hr4, 5hr9, 5hrb, 5hrd, 5hrf, 5hrg, 5hrh, 5hro, 5hrt, 5hso, 5i3u,<br>5i42, 5i44, 5i50, 5iii, 5iij, 5iik, 5iil, 5iim, 5iin, 5iio, 5ink, 5inl, 5ino, 5inq,<br>5ipl, 5ivw, 5iwi, 5iwm, 5j0n, 5j0o, 5j0p, 5j0q, 5j0r, 5j0s, 5j0t, 5j0u,<br>5j0w, 5j0x, 5j0y, 5j29, 5j2a, 5j2b, 5j2c, 5j2d, 5j2e, 5j2f, 5j2g, 5j2h,<br>5j2i, 5j2j, 5j2k, 5j2m, 5j2n, 5j2p, 5j2q, 5j3e, 5jgh, 5jk0, 5jlw, 5jlx, 5jub,<br>5jum, 5jvt, 5jxy, 5k1y, 5k58, 5k5o, 5k5q, 5k5r, 5k7z, 5k98, 5kbd,<br>5kbj, 5ke6, 5ke7, 5ke8, 5ke9, 5kea, 5keb, 5kfa, 5kfb, 5kfc, 5kfd,<br>5kfe, 5kff, 5kfg, 5kfh, 5kfi, 5kfj, 5kfk, 5kfl, 5kfm, 5kfn, 5kfo, 5kfp,<br>5kfq, 5kfr, 5kfs, 5kft, 5kfu, 5kfv, 5kfw, 5kfx, 5kfy, 5kfz, 5kg0, 5kg1,<br>5kg2, 5kg3, 5kg4, 5kg5, 5kg6, 5kg7, 5kk1, 5kl2, 5kl3, 5kl4, 5kl5,<br>5kl6, 5kl7, 5kn8, 5kn9, 5krb, 5kt2, 5kt3, 5kt4, 5kt5, 5kt6, 5kt7, 5kub,<br>5l0m, 5l1i, 5l1j, 5l1k, 5l1l, 5l2x, 5l6l, 5l7c, 5l9x, 5lej, 5lek, 5lgy, 5lrs,<br>5m0q, 5m0r, 5swm, 5sy7, 5szt, 5t14, 5t1j, 5t2w, 5tb8, 5tb9, 5tba,<br>5tbb, 5tbc, 5tct, 5tgx, 5th3, 5trd, 5tzs, 5tzv, 5u9h, 5fyw, 5fz5, 5fur,<br>5i2d, 5ipl, 5inp, 5iud, 5iy6, 5iy7, 5iy8, 5iy9, 5iya, 5iyb, 5iyc, 5iyd,<br>5sva, 5tw1, 5b0z, 5b2i, 5b2j, 5b31, 5b32, 5b33, 5b40, 5kgf |

**Supplementary Table 2:** Validation dataset of PADA1, containing dsDP and released in the PDB after 2016. The validation set was divided into three subsets: small proteins, huge proteins and histones.



| DataSet                    | PDB Codes List                                                                                                                                                                                                                                                                           |
|----------------------------|------------------------------------------------------------------------------------------------------------------------------------------------------------------------------------------------------------------------------------------------------------------------------------------|
| Haddock Benchmark Data Set | 1a74, 1azp, 1b3t, 1bd1, 1by4, 1cma, 1ddn, 1dfm, 1diz, 1ea4, 1emh, 1eyu, 1f4k, 1fok, 1g9z, 1h9t, 1hjc, 1jj4, 1jt0, 1k79, 1kc6, 1ksy, 1mnn, 1o3t, 1pt3, 1qne, 1qrv, 1r4o, 1rpe, 1rva, 1tro, 1vas, 1vrr, 1w0t, 1z63, 1z9c, 1zme, 1zs4, 2c5r, 2fio, 2fl3, 2irf, 2oaa, 3bam, 3cro, 4ktq, 7mht |

**Supplementary Table 3:** Validation dataset of the Haddock algorithm used for benchmarking, consisting of 74 DNA binding proteins provided in its bounded and unbounded form.
